# Supplementary material for: Fish oil affects the metabolic process of trimethylamine N-oxide precursor through trimethylamine production and flavin-containing monooxygenase activity in male C57BL/6 mice
Source: Royal Society of Chemistry journal article supplement (doi:10.1039/c7ra10248h), 2017-01-01
Supplement: c7ra10248h1.pdf [file c7ra10248h1.pdf]

Table S1 Fatty acid composition of fish oil

| Main fatty acids   | % of total fatty acid |
|--------------------|-----------------------|
| C12:0              | 0.39                  |
| C14:0              | 0.29                  |
| C16:0              | 0.56                  |
| C18:0              | 0.37                  |
| C18:1              | 0.27                  |
| C18:2              | 0.65                  |
| C18:3              | 0.39                  |
| C20:1              | 0.25                  |
| C20:4              | nd                    |
| C20:5              | 7.92                  |
| C22:5              | 1.07                  |
| C22:6              | 71.56                 |
| $\Sigma$ SFAs      | 11.06                 |
| $\Sigma$ MUFAs     | 5.34                  |
| $\Sigma$ n-6 PUFAs | 0.65                  |
| $\Sigma$ n-3 PUFAs | 79.88                 |

Note: “nd” means not detected.

Table S2 Ingredient composition of the experimental diets (g/kg diet)

| Ingredients              | Chow diet | Fish oil |
|--------------------------|-----------|----------|
| Casein                   | 200       | 200      |
| Sucrose                  | 100       | 100      |
| Corn starch              | 397.49    | 397.49   |
| Malto-dextrin            | 132       | 132      |
| Powdered cellulose       | 50        | 50       |
| Mineral-salt mix         | 35        | 35       |
| Vitamin mix              | 10        | 10       |
| DL-methionine            | 3         | 3        |
| Choline bitartrate       | 2.5       | 2.5      |
| TBHQ                     | 0.02      | 0.02     |
| Hydrogenated coconut oil | 54.25     | 39.25    |
| Safflower oil            | 12.39     | 12.39    |
| Flaxseed oil             | 3.36      | 3.36     |
| DHA-enriched fish oil    | 0         | 15       |

Notes: TBHQ means tertiary butylhydroquinone.

Table S3 Fatty acid composition of the experimental diets (% of total FA)

| Fatty acids     | Chow diet | Fish oil |
|-----------------|-----------|----------|
| ΣSFAs           | 79.80     | 60.74    |
| ΣMUFAs          | 2.74      | 3.89     |
| C18:2 n-6       | 14.51     | 14.65    |
| C18:3 n-3       | 2.88      | 2.96     |
| C20:4 n-6 (AA)  | nd        | nd       |
| C20:5 n-3 (EPA) | nd        | 0.63     |
| C22:6 n-3 (DHA) | nd        | 15.33    |

Note: “nd” means not detected.

Table S4 Sequences of the primers used in the quantitative RT-PCR

| Gene           | Forward primers         | Reverse primers         |
|----------------|-------------------------|-------------------------|
| FMO1           | CGTGGAGGCCAGCCACT       | CACCCATGCCCCTCCAG       |
| FMO2           | CACATCCAGCCTCACCTGC     | GGCCTCGGAACCTCTCAATAC   |
| FMO3           | CACCACTGAAAAGCACGGTA    | CTTATAGTCCCTGCTGTGGAAGC |
| FMO5           | AGACTACAGTGTGCAGCGTGAAG | GCCATTGGCCCGAGGTA       |
| $\beta$ -Actin | GCAGATGTGGATCAGCAAGC    | GTCAAAGAAAGGGTGTAACG    |
